# Supplementary material
Source: MDPI journal article supplement (https://www.mdpi.com/2071-1050/12/4/1507)
Supplement: s1 [file s1]

**Supplementary Materials:**

**Table S1:** Species diversity index calculations.

| <b>Diversity indices</b> | <b>Abbreviation</b> | <b>Measurement</b>                 |
|--------------------------|---------------------|------------------------------------|
| Shannon–Weaver index     | H                   | $H = - \sum_{i=1}^S (P_i \ln P_i)$ |
| Pielou evenness          | E                   | $E = \frac{H}{\ln S}$              |
| Simpson dominance        | D                   | $D = 1 - \sum_{i=1}^S (P_i)^2$     |

Note:  $P_i$  is the relative density of species  $i$ , and  $S$  is the number of species in the survey plot.
